# Supplementary material
Source: publisher figshare collection journal article supplement (https://acs.figshare.com/ndownloader/files/3887380)
Supplement: Supplementary file 1 [file 3887380]

# Self-assembly in Nafion membranes upon hydration: water mobility and adsorption isotherms.

*Aleksey Vishnyakov and Alexander V. Neimark\**

Department of Chemical Engineering, Rutgers, the State University of New Jersey  
98 Brett Road, Piscataway NJ 08854

## SUPPORTING INFORMATION

### I. Relative volumes of the beads

Table S1.

| Bead                                   | W                                 | C                                  | E                                              | S                                                   | S <sup>□</sup>                                                 |
|----------------------------------------|-----------------------------------|------------------------------------|------------------------------------------------|-----------------------------------------------------|----------------------------------------------------------------|
| Fragment                               | (H <sub>2</sub> O) <sub>4.5</sub> | (-CF <sub>2</sub> -) <sub>4</sub>  | -O-CF(CF <sub>3</sub> )-<br>CF <sub>2</sub> -O | (-CF <sub>2</sub> -) <sub>2</sub> SO <sub>3</sub> K | (-CF <sub>2</sub> -) <sub>2</sub> SO <sub>3</sub> <sup>-</sup> |
| $\Sigma r_i$ <sup>(a)</sup>            | 4.14                              | 4.04                               | 3.67                                           |                                                     |                                                                |
| Representative compound <sup>(b)</sup> | H <sub>2</sub> O                  | H(CF <sub>2</sub> ) <sub>4</sub> H | CF <sub>3</sub> OCFOCF <sub>2</sub> H          | H(CF <sub>2</sub> ) <sub>2</sub> SO <sub>3</sub> K  | H(CF <sub>2</sub> ) <sub>2</sub> SO <sub>3</sub> <sup>-</sup>  |
| $V_{\text{COSMO}}$                     | 29.1                              | 141.1                              | 112.7                                          | 124.2                                               | 140.7                                                          |
| Effective volume, Å <sup>3</sup>       | 134.5                             | 131.3                              | 117.1                                          | 119.3                                               | 136.5                                                          |

(a) sum of volume parameters  $r_i$  for the functional group forming the fragment

(b) molecule, for which the COSMO volume was calculated using PQS ab-initio; correspondingly  $V_{\text{COSMO}}$  is the volume of the molecule, rather than the bead volume

---

\* author for correspondence, [aneimark@rutgers.edu](mailto:aneimark@rutgers.edu)

## II. Details of MD simulations for DPD parameter fitting

The simulation procedures were similar to those employed in refs. <sup>1-3</sup> We used MDynaMix <sup>4</sup> software package. In the initial configuration, molecules were arranged in a lattice order at a low density of 0.005 g/cm<sup>3</sup>. The system was then gradually contracted in a series of constant-temperature MD simulations at  $T = 303\text{K}$  maintained by a simple velocity scaling. After the density of 1.0g/cm<sup>3</sup> (aqueous solutions) or 1.7 g/cm<sup>3</sup> (perfluorohexadecane) was achieved, the simulation proceeded at a constant pressure  $P = 1\text{atm}$ .  $T$  and  $P$  were maintained by the Nose-Hoover thermostat. <sup>5, 6</sup> System equilibration was performed for 200 ps followed by additional 10 to 1 ns MD simulation, over which the system configuration was periodically saved to disc for analysis. The distribution of distances between the beads in DPD simulations were fitted to the distances between the centers of mass of the corresponding fragments (see Table 1 in the main text and Table S1). In order to maintain symmetry in Nafion model, we assumed that some fluorocarbon groups were divided between the two neighboring beads. In particular, the location of bead C1 from the MD trajectories of the Nafion fragment shown in Figure S1(a) was calculated as

$$\mathbf{r}_{\text{C1}} = (\mathbf{r}_3 * M_{\text{CF}} + \mathbf{r}_2 * M_{\text{CF2}} + \mathbf{r}_4 * M_{\text{CF2}} + 0.5 * \mathbf{r}_1 * M_{\text{CF2}} + 0.5 * \mathbf{r}_5 * M_{\text{CF2}}) / (M_{\text{CF}} + 4 * M_{\text{CF2}})$$

The indexes of fluorocarbon groups are also shown in the Figure.

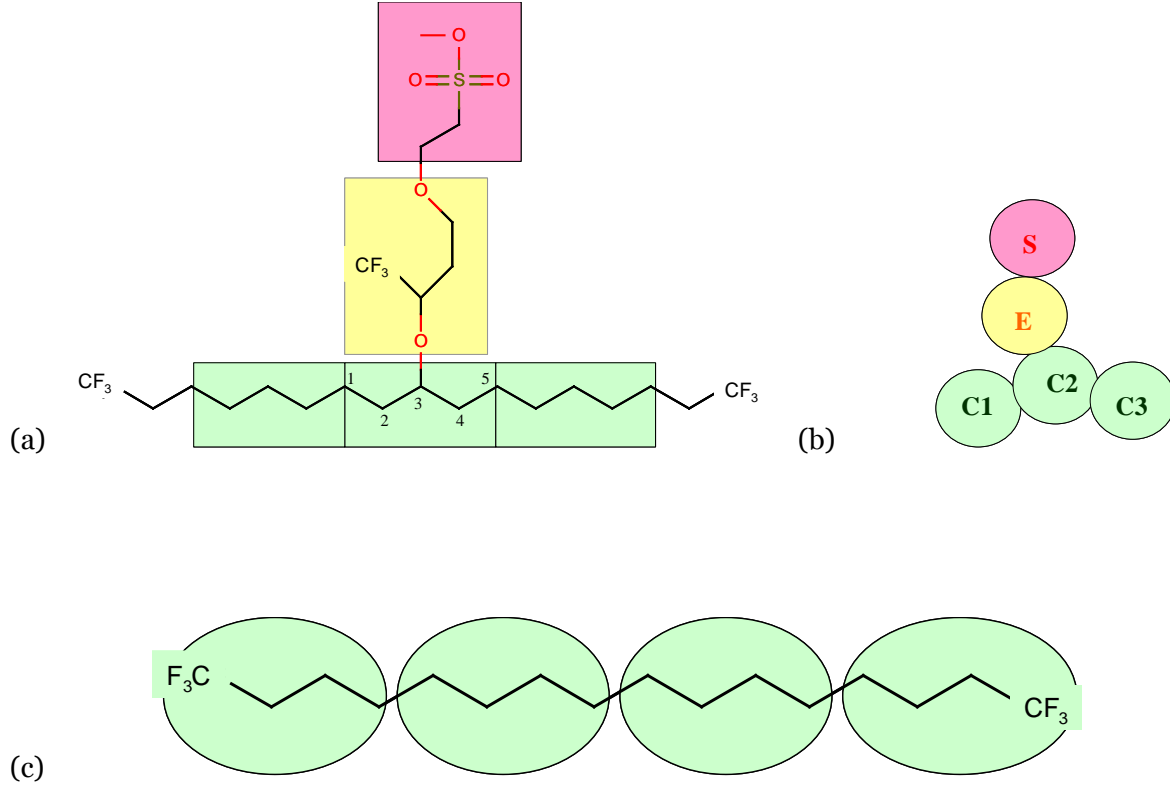

Figure S1. (a) Nafion fragment modeled in aqueous solution by molecular dynamics in order to obtain distribution of distances between the bead centers (b) coarse-grained model of Nafion fragment simulated by DPD (3) molecular and coarse-grained models of perfluorohexadecane

### III. Details of DPD simulations.

Nafion was presented by oligomers each containing 20 monomers. Bead density  $\rho^* R_c^3$  in the system was set to 3, a common choice for aqueous solutions. The random force, which accounts for thermal fluctuations, is taken proportional to the conservative force that is also acting along the vector between the bead centers:  $\mathbf{F}_{ij}^{(R)}(r_{ij}) = \sigma w^R(r_{ij}) \theta_{ij}(t) \mathbf{r}_{ij}$ , where  $\theta_{ij}(t)$  is a randomly fluctuating in time variable with Gaussian statistics. The drag force is velocity-dependent:  $\mathbf{F}_{ij}^{(D)}(\mathbf{r}_{ij}, \mathbf{v}_{ij}) = -\gamma w^D(r_{ij}) (\mathbf{r}_{ij} * \mathbf{v}_{ij})$ , where,  $\mathbf{v}_{ij} = \mathbf{v}_j - \mathbf{v}_i$ ,  $\mathbf{v}_i$  and  $\mathbf{v}_j$  are the current velocities

of the particles. We assume the common relationship between the drag and random force parameters  $w^D(r) = [w^R(r)]^2$ .  $\sigma$  and  $\gamma$  are parameters that determine the level of energy fluctuation and dissipation; they are related as  $\sigma^2 = 2\gamma kT$  that allows to maintain constant temperature in the course of simulation. We assumed  $\gamma = 4.5$ , a common value fitted to the diffusion coefficient of water. In the initial configuration, all beads were assigned random locations in the box. Starting from this random configuration, we performed a steepest descent energy minimization taking in account only harmonic bond and short-range conservative forces. The minimization was followed by 10000 step preliminary MD simulation ( $\gamma = 0$ , no drag or random forces) at temperature fixed by velocity scaling on each step. DPD simulations started from the final configuration obtained in that preliminary MD run. In-house DPD program was used.

### **III.A. Simulations of Nafion fragments employed in forcefield fitting.**

The systems exactly mimicked the MD simulations (Tabke S2). Simulations were 150000 DPD steps long, time step in reduced time units was  $0.02(m_W R_c^2 / kT)^{1/2}$ . First 50000 steps were discarded. After that the coordinates of all beads except solvent beads were dumped to disk every 100 steps. The distributions of intramolecular distances and angles were calculated from this trajectory. In first simulations, we used reasonable bond parameters approximately evaluated from average distances and dispersions obtained in MD simulations. Then, the bonds were optimized from one simulations to another in order to improve the agreement with the MD results similarly to ref<sup>8</sup>

### **III.B. Simulations of hydrated Nafion**

Nafion was presented by oligomers each containing 20 monomers. Simulations were conducted in cubic boxes of  $30R_c$  (22.3nm) in size, the total number of beads was around 81000 in each simulations. The total numbers of beads of each type is given in the table at the bottom of this section. On the minimization and preliminary scaled-velocity MD stages, all beads were uncharged. Before DPD simulations started, S beads were converted to S<sup>-</sup> (at low hydration, the beads for conversion were chosen randomly), and randomly chosen W beads were converted to M<sup>+</sup> beads, according to the targeted system composition. The total number of DPD steps was 800000 in each simulation. The initial configuration was created by placing all beads at random coordinates within the simulation box. Then the energy was minimized using a primitive steepest descent algorithm, which lead to a segregated system with small hydrophilic clusters of several W, S and M beads. The minimization was followed by 10000 step preliminary MD simulation ( $\gamma = 0$ , no drag or random forces) at temperature fixed by velocity scaling on each step. DPD simulations started from the final configuration obtained in that preliminary MD run. DPD simulations were started from these configurations. First 200000 DPD steps were performed with no long-range correction (electrostatic interactions were cut off at  $5R_c$ ), and after that, Ewald summation was turned on to account for the long-range electrostatics. The structural evolution was characterized using the number of overlapping pairs of mobile (W and M<sup>+</sup>) beads as a criterion. The initial portions of each trajectory characterized by a persistent upward trend (about 400000 steps) were discarded. Over the last 400000 steps, the system configuration was dumped to disk every 1000 steps. In so doing, we collected 400 configurations for structural analysis and the calculation s of chemical potentials of water via Widom insertions.

Table S2. Numbers of beads of different types in each simulation. The number of  $M^+$  (hydrated counterion) beads equals the number of  $S^-$  beads. There were no W beads in all simulations for  $\lambda=2.24$

| $\lambda =$ | 2.2   |      |       | 4.5   |      |       | 6.8   |       |       |
|-------------|-------|------|-------|-------|------|-------|-------|-------|-------|
| PEW         | S-    | S    | C     | S-    | W    | C     | S-    | W     | C     |
| 945         | 11172 | 6284 | 52371 | 15511 | 3447 | 46532 | 17153 | 12388 | 51459 |
| 1145        | 9191  | 5170 | 57447 | 13018 | 2893 | 52071 | 14155 | 10223 | 56621 |
| 1345        | 7807  | 4392 | 60994 | 11215 | 2492 | 56077 | 12050 | 8702  | 60248 |
| 1745        | 6000  | 3375 | 65625 | 8783  | 1952 | 61482 | 9287  | 6707  | 65006 |

| 9.0   |       |       | 13.5  |       |       | 18.0  |       |       |
|-------|-------|-------|-------|-------|-------|-------|-------|-------|
| S-    | W     | C     | S-    | W     | C     | S-    | W     | C     |
| 15511 | 18957 | 46532 | 13018 | 28929 | 39054 | 11215 | 36138 | 33646 |
| 13018 | 15911 | 52071 | 11215 | 24923 | 44862 | 9851  | 31743 | 39405 |
| 11215 | 13708 | 56077 | 9851  | 21892 | 49257 | 8783  | 28301 | 43916 |
| 8783  | 10735 | 61482 | 7924  | 17609 | 55467 | 7218  | 23257 | 50525 |

### III. C. Electrostatic interactions: comparison between smeared and point charges.

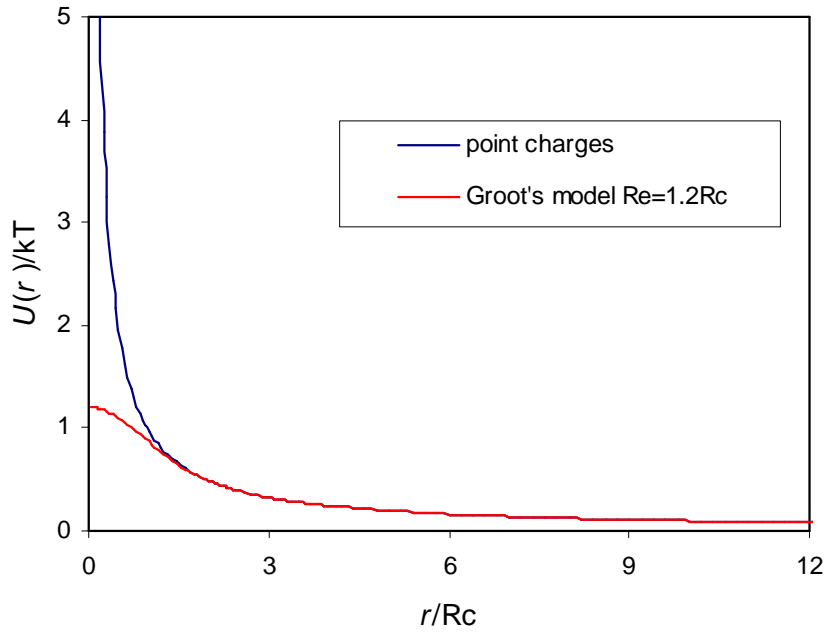

Figure S2. Comparison of electrostatic potential between two  $+e$  point charges and linearly smeared charges with smearing radius of  $R_e=1.2R_c$  in a dielectric medium of  $\epsilon = 78$ , which corresponds to .water at room temperature.

#### IV. Water sorption and diffusion in hydrated Nafion

Table S3. Main results.

| $\lambda =$ | 9                 |              |                | 13.5              |              |                | 18                |              |                |
|-------------|-------------------|--------------|----------------|-------------------|--------------|----------------|-------------------|--------------|----------------|
|             | $m_W/m_{pol}, \%$ | $\phi_W, \%$ | $D_W/D_{pure}$ | $m_W/m_{pol}, \%$ | $\phi_W, \%$ | $D_W/D_{pure}$ | $m_W/m_{pol}, \%$ | $\phi_W, \%$ | $D_W/D_{pure}$ |
| PEW         |                   |              |                |                   |              |                |                   |              |                |
| 945         | 16.5              | 28.6         | 0.12           | 24.7              | 37.5         | 0.11           | 32.9              | 44.4         | 0.04           |
| 1145        | 13.7              | 25.0         | 0.014          | 20.5              | 33.3         | 0.009          | 27.4              | 40.0         | 0.002          |
| 1345        | 11.7              | 22.2         | 0.0009         | 17.6              | 30.0         | 0.0002         | 23.4              | 36.4         | 0              |
| 1745        | 9.1               | 18.2         | 0              | 13.6              | 25.0         | 0              | 18.2              | 30.8         | 0              |
| $\lambda =$ | 2.24              |              |                | 4.5               |              |                | 6.75              |              |                |
|             | $m_W/m_{pol}, \%$ | $\phi_W, \%$ | $D_W/D_{pure}$ | $m_W/m_{pol}, \%$ | $\phi_W, \%$ | $D_W/D_{pure}$ | $m_W/m_{pol}, \%$ | $\phi_W, \%$ | $D_W/D_{pure}$ |
| PEW         |                   |              |                |                   |              |                |                   |              |                |
| 945         | 4.1               | 9.1          | 0.001          | 8.2               | 16.7         | 0.011          | 12.3              | 23.1         | 0.062          |
| 1145        | 3.4               | 7.7          | 0              | 6.8               | 14.3         | 0.0029         | 10.3              | 20.0         | 0.0087         |
| 1345        | 2.9               | 6.6          | 0              | 5.9               | 12.5         | 0.0002         | 8.8               | 17.6         | 0.0019         |
| 1745        | 2.3               | 5.2          | 0              | 4.5               | 10.0         | 0.0001         | 6.8               | 14.3         | 0.0006         |

$m_W/m_{pol}$  are calculated assuming  $K^+$  as cation

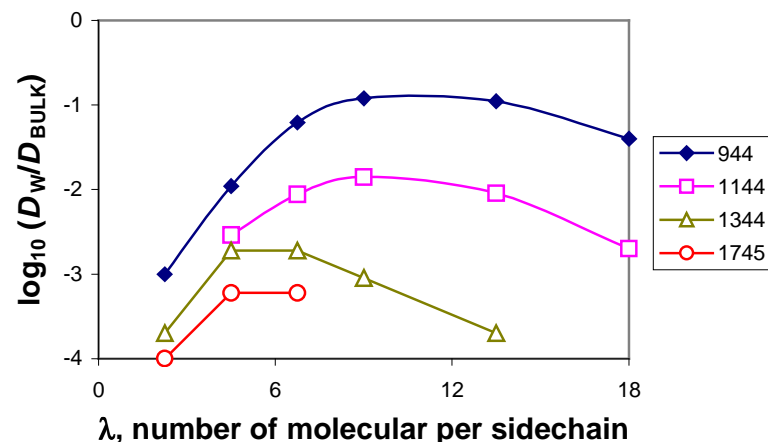

Figure S3. Self-diffusion coefficient of water in hydrated Nafion reduced to the diffusion coefficient of pure water for polymers of hydration level  $\lambda$ .

## References

- (1) Vishnyakov, A.; Neimark, A.V., Molecular Simulation Study of Nafion Membrane Solvation in Water and Methanol, *Journal of Physical Chemistry B*, **2000**, *104*, 4471-4478.
- (2) Vishnyakov, A.; Neimark, A.V., Molecular Dynamics Simulation of Nafion Oligomer Solvation in Equimolar Methanol-Water Mixture, *Journal of Physical Chemistry B*, **2001**, *105*, 7830-7834.
- (3) Vishnyakov, A.; Neimark, A.V., Specifics of Solvation of Sulfonated Polyelectrolytes in Water, Dimethylmethylphosphonate, and Their Mixture: A Molecular Simulation Study, *Journal of Chemical Physics*, **2008**, *128*, 164902.
- (4) Lyubartsev, A.P.; Laaksonen, A., M.Dynamix - a Scalable Portable Parallel Md Simulation Package for Arbitrary Molecular Mixtures, *Computer Physics Communications*, **2000**, *128*, 565-589.
- (5) Hoover, W.G., Canonical Dynamics - Equilibrium Phase-Space Distributions, *Physical Review A*, **1985**, *31*, 1695-1697.
- (6) Nose, S., A Unified Formulation of the Constant Temperature Molecular-Dynamics Methods, *Journal of Chemical Physics*, **1984**, *81*, 511-519.
- (7) Pagonabarraga, I.; Hagen, M.H.J.; Frenkel, D., Self-Consistent Dissipative Particle Dynamics Algorithm, *Europhys. Lett.*, **1998**, *42*, 377-382.
- (8) Lyubartsev, A.P.; Karttunen, M.; Vattulainen, I.; Laaksonen, A., On Coarse-Graining by the Inverse Monte Carlo Method: Dissipative Particle Dynamics Simulations Made to a Precise Tool in Soft Matter Modeling, *Soft Mater.*, **2003**, *1*, 121-137.
